# Supplementary material
Source: publisher figshare collection journal article supplement (https://tandf.figshare.com/ndownloader/files/17838101)
Supplement: Supplementary file 1 [file 17838101]

Attachment.Spatial and stratigraphical distribution of glendonites in the Northern Hemisphere (number in the first column matches number of glendonite findings on fig. 1).

| No on fig. 4 | Locality | Lithology of glendonite-host rock | Age | Data source |
| --- | --- | --- | --- | --- |
| 1 | Northern Germany | Silty and marly mudstones, | Late Pliensbachian | Teichert & Luppold 2013; van de Schootbrugge et al. 2018 |
| 2 | Barents Sea shelf | Sandstones, siltstones | Bathonian | Ustinov et al. 2013 |
| 3 | Ust'-Yenisei depression, Russia | Mudstones and siltstones | Aalenian, Bajocian and Bathonian | Baibarodskih et al. 1968 |
| 4 | Eastern Taymyr, Chernokhrebetnaya river, Russia | Siltstones | Aalenian, Middle-Upper Callovian | Levchuk 1985; Nikitenko 2009 |
| 5 | Khatanga Bay | Siltstones | Bajocian and Pliensbachian Late | Voronov 1961 |
| 6 | Anabar bay and Yurung-Tumus peninsula, Russia | Clays and mudstones, siltstones, sandstones | Pliensbachian - Bathonian | Kalinko 1953; Meledina & Nalnjaeva 1972; Nikitenko 2009; Suan et al. 2011; Nikitenko et al. 2013; |
| 7 | Olenek river area | Black shales, siltstones and sandstones | Pliensbachian Late and Bajocian Late | Gusev 1950; Meledina et al. 1978 |
| 8 | Basin of Upper Lena river (Molodo and Kulumas rivers), East Yakutia | Clays, siltstones, sandstones | Pliensbachian Late and Bathonian Early | Sach et al. 1976; Kirina et al. 1978; Meledina et al. 1978 |
| 9 | The upper Lena river | Mudstones, siltstones, sandstones | Pliensbachian Late, Bajocian Late - Bathonian Early | Ivanovskaya 1967; Mezhvilk et al. 1983; Morales et al. 2017 |
| 10 | Zhigansk borehole 42, Lena river basin | sandstones, siltstones, mudstones | Bajocian Late and Bathonian Early | Sach et al. 1976 |
| 11 | Viluy river, Viluy syneclise | Clay | Aalenian, Bajocian Early, Pliensbachian Late | Kirina 1966 |
| 12 | Yarysaakh river (basin of Lower Lena river) | Sandstones | Bathonian Early and Late | Djinoridze & Meledina 1965; Djinoridze 1966 |
| 13 | Syncha river (basin of Upper Lena river) | Mudstones and siltstones | Bajocian Late | Zinchenko 1982 |
| 14 | SE of In'yali-Debinski synclinorium | Mudstones, siltstones, sandstones | Bajocian | Bychkov 1966 |
| 15 | East edge of Siberia platform (Dulgallah an Lyapiske rivers) | sandstones and siltstones | Aalenian late - Bajocian early | Grinenko et al. 2012 |
| 16 | the upper Yana and Indigirka rivers | mudstones, siltstones, sandstones | Bajocian Late, Aalenian | Truschelev & Grinenko 2016 |
| 17 | Ulaga river | Mudstones | Bajocian Late | Vozin 1962 |
| 18 | Northeast Russia,  Amga - Aldan interflows, Arman' river, Khandyga river | Sandstones, siltstones, mudstones | Pliensbachian Late | Tuchkov 1962 |
| 19 | Viliga river and Kananyga river, Kilderkich river, Kedon river, NW Russia | Mudstones, siltstones, sandstones | Pliensbachian Late, Aalenian, Bajocian, Bathonian – Callovian | Domokhotov 1961; Polubotko & Repin 1974; Sach et al. 1976; Paraketsov & Paraketsova 1989 |
| 20 | Blue Mountains, Ellesmere Island, Canada | Sandy shales | Bathonian (Upper Savik Shale) | Moore 1981 |
